# Supplementary material for: Towards improved comprehensive energetic properties by skeleton modification
Source: Royal Society of Chemistry journal article supplement (doi:10.1039/d3nj05248f), 2023-12-11
Supplement: d3nj05248f1.pdf [file d3nj05248f1.pdf]

## Electronic Supplementary Information

### Towards Improved Comprehensive Energetic Properties by Skeleton Modification

Jingwen Li, <sup>a,b</sup> Xun Zhang, <sup>a,b</sup> Yaxi Wang, <sup>a,b</sup> Dongshuai Su, <sup>a,b</sup> Siping Pang, <sup>a</sup> Chunlin He <sup>a,b,c\*</sup>

<sup>a</sup>*School of Materials Science & Engineering, Beijing Institute of Technology, Beijing 100081, China.*

<sup>b</sup>*Experimental Center of Advanced Materials, School of Materials Science & Engineering, Beijing Institute of Technology, Beijing 100081, China.*

<sup>c</sup>*Chongqing Innovation Center, Beijing Institute of Technology, Chongqing 401120, China.*

\*Email: [pangsp@bit.edu.cn](mailto:pangsp@bit.edu.cn); [chunlinhe@bit.edu.cn](mailto:chunlinhe@bit.edu.cn)

### Table of Contents

|                                                   |    |
|---------------------------------------------------|----|
| 1. Experimental Section .....                     | 2  |
| 2. Theoretical calculation.....                   | 3  |
| 3. Crystallographic data .....                    | 4  |
| 4. NMR, DSC and IR spectra of new compounds ..... | 8  |
| Reference .....                                   | 16 |

## 1. Experimental Section

General Methods: All the reactions were carried out in the air. Unless otherwise noted, all commercial reagents and solvents were obtained from a commercial provider and used without further purification.  $^1\text{H}$  NMR and  $^{13}\text{C}$  NMR spectra were recorded on Bruker 400 MHz spectrometers. Chemical shifts were reported relative to internal DMSO for  $^1\text{H}$  and DMSO for  $^{13}\text{C}$ . The melting and decomposition (onset) points were obtained on a differential scanning calorimeter at a scan rate of  $10\text{ }^\circ\text{C min}^{-1}$ . IR spectra of solid-state samples were recorded on Thermo Nicolet iS50 FT-IR. Elemental analyses (C, H, N) were carried out on a Vario Micro cube elemental analyzer. The sensitivities to impact (IS) and friction (FS) were determined according to BAM standards.

**3,6-diamino-[1,2,4]triazolo[3,4-f][1,2,4]triazine-8(7H)-one (P4):** The compound **P4** was synthesized by a modified method from the literature. 0.85g (6 mmol) of **P3** was dissolved in 10 mL of 1 M hydrochloric acid, 0.71 g (6.5 mmol) of cyanogen bromide was added to the reaction mixture and stirred at room temperature for 24 h. The resulting reaction system was filtered to obtain a solid, the filter cake was washed with water and dried to obtain 0.78 g of solid, yielding 78%.

**6-nitroamino-3-nitroimino-8-oxo-7,8-dihydro-[1,2,4]triazolo[3,4-f][1,2,4]triazine (6):** At  $0^\circ\text{C}$ , 5 mL of 100% fuming nitric acid was cooled to  $0\text{--}5^\circ\text{C}$ , to which 0.5 g of **P4** was slowly added. The reaction system was stirred at  $0^\circ\text{C}$  for 3 h, after which it was slowly brought to room temperature. Most of the nitric acid was blown off, 10 mL of TFA was added, stirred for 10 min, a solid precipitated, filtered and washed with TFA to give 0.408 g of solid in 53% yield.  $^1\text{H}$  NMR (400 MHz, DMSO- $d_6$ ):  $\delta$  4.75(s,2H) ppm.  $^{13}\text{C}$  NMR (100 MHz, DMSO- $d_6$ ):  $\delta$  151.6, 147.7, 147.1, 136.5 ppm. IR:  $\tilde{\nu}$  = 3359, 1747, 1583, 1470, 1314, 1273, 1199,1083, 709, 616  $\text{cm}^{-1}$ . EA ( $\text{C}_4\text{H}_3\text{N}_9\text{O}_5$ , 257.03): Calcd (%), C: 18.69, H: 1.18, N: 49.03; Found (%), C: 18.35, H: 1.24, N:48.60.

**Diammonium 6-nitroamino-3-nitroimino-8-oxo-7,8-dihydro-[1,2,4]triazolo[3,4-f][1,2,4]triazine (7):** 0.129g of **6** (0.5mmol) was dissolved in 4mL of methanol, to which 0.076mL of ammonia (1mmol) was added. The solid obtained was stirred for 30 min at room temperature, filtered and washed with ether to give 0.135 g of solid in 93% yield.  $^1\text{H}$  NMR (400 MHz, DMSO- $d_6$ ):  $\delta$  7.48(s,8H) ppm.  $^{13}\text{C}$  NMR(100 MHz, DMSO- $d_6$ ):  $\delta$  152.4, 152.0, 150.4, 138.0 ppm. IR:  $\tilde{\nu}$  =3141, 1724, 1587,1498, 1391, 1282, 1082, 875,869, 750, 695  $\text{cm}^{-1}$ . EA ( $\text{C}_4\text{H}_9\text{N}_{11}\text{O}_5$ , 291.08): Calcd (%), C: 16.50, H: 3.12, N: 52.91; Found (%), C: 16.43, H: 2.98, N:51.86.

**Dihydrazinium 6-nitroamino-3-nitroimino-8-oxo-7,8-dihydro-[1,2,4]triazolo[3,4-f][1,2,4]triazine (8):** 0.129 g of **6** (0.5 mmol) was dissolved in 4 mL of methanol, to which 0.058 mL of 85% hydrazine hydrate (1 mmol) was added. Stirred for 30 min at room temperature, the resulting solid was filtered and washed with ether to give 0.148 g of solid in 92% yield.  $^1\text{H}$  NMR (400 MHz, DMSO- $d_6$ ):  $\delta$  7.46(s,10H) ppm.  $^{13}\text{C}$  NMR (100 MHz, DMSO- $d_6$ ):  $\delta$  152.4, 151.9, 150.5, 137.9 ppm. IR:  $\tilde{\nu}$  = 3359, 1747, 1583, 1470, 1314, 1273, 1199,1083, 709, 616  $\text{cm}^{-1}$ . EA ( $\text{C}_4\text{H}_{11}\text{N}_{13}\text{O}_5$ , 321.10): Calcd (%), C: 14.96, H: 3.45, N: 56.69; Found (%), C: 14.75, H: 3.42, N:55.48.

**Dihydroxylammonium 6-nitroamino-3-nitroimino-8-oxo-7,8-dihydro-[1,2,4]triazolo[3,4-f][1,2,4]triazine (9):** 0.129g of **6** (0.5mmol) was dissolved in 4mL of methanol to which was added 0.059mL of a 50% aqueous solution of hydroxylamine (1mmol). The solid obtained was stirred for 30 min at room temperature and filtered and washed with ether to give 0.146 g of solid in 90% yield.  $^1\text{H}$  NMR (400 MHz, DMSO- $d_6$ ):  $\delta$  10.17(s,8H) ppm.  $^{13}\text{C}$  NMR (100 MHz, DMSO- $d_6$ ):  $\delta$

152.2, 151.2, 150.6, 137.7 ppm. IR:  $\tilde{\nu}$  = 3109, 2913, 1704, 1580, 1498, 1441, 1121, 854, 729, 652  $\text{cm}^{-1}$ . EA( $\text{C}_4\text{H}_9\text{N}_{11}\text{O}_7$ , 323.07): Calcd (%), C: 14.87, H: 2.81, N: 47.67; Found (%), C: 14.98, H: 2.80, N: 46.98.

## 2. Theoretical calculation

The calculations of the heats of formation were carried out using Gaussian 09 (Revision D.01) suite of programs. All the compounds were determined using isodesmic reactions (**Scheme S1**). The geometric optimization and frequency analyses of the structures were calculated using B3LYP/6-311++G\*\* level. The single energy points were calculated at the M062X/de2tzvpp level. The heats of formation for complex structures were obtained by atomization using G2 ab initio method. <sup>[1,2]</sup> All of the optimized structures were characterized to be true local energy minima on the potential energy surface without imaginary frequencies.

The isodesmic reactions for compound **6** and its anions are as follows :

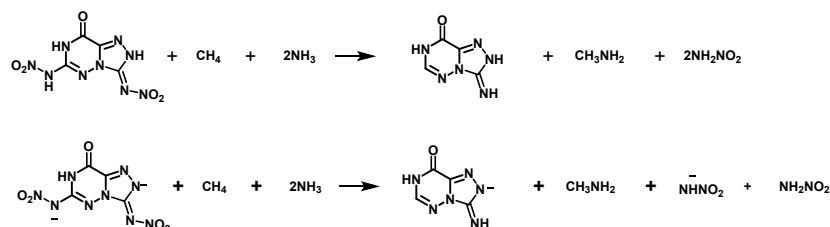

**Scheme S1.** Isodesmic reactions to compute the HOF.

**Table S1.** Calculated total energy ( $E_0$ ), zero-point energy (ZPE), values of the correction ( $H_{\text{corr}}$ ), and enthalpy of formation in gas-state (HOF) for compound **6**.

| Comp.                                                                               | ZPE<br>(a.u.) | $H_{\text{corr}}$<br>(a.u.) | $E_0$<br>(a.u.) | Corrected $E_0$ | $\Delta_f H_{\text{gas}}$<br>(kJ mol <sup>-1</sup> ) | $\Delta H_L$<br>(Kcal mol <sup>-1</sup> ) | $\Delta_f H_{\text{sub}}$<br>(kJ mol <sup>-1</sup> ) | $\Delta_f H_{\text{solid}}$<br>(kJ mol <sup>-1</sup> ) |
|-------------------------------------------------------------------------------------|---------------|-----------------------------|-----------------|-----------------|------------------------------------------------------|-------------------------------------------|------------------------------------------------------|--------------------------------------------------------|
| CH <sub>4</sub>                                                                     | 0.044604      | 0.048417                    | -40.5019        | -40.4552        | -77.70 <sup>a</sup>                                  |                                           |                                                      |                                                        |
| NH <sub>3</sub>                                                                     | 0.034296      | 0.038105                    | -56.5520        | -56.5152        | -45.10 <sup>a</sup>                                  |                                           |                                                      |                                                        |
| CH <sub>3</sub> NH <sub>2</sub>                                                     | 0.064305      | 0.068654                    | -95.8451        | -95.7791        | -22.87 <sup>a</sup>                                  |                                           |                                                      |                                                        |
| NH <sub>2</sub> NO <sub>2</sub>                                                     | 0.039419      | 0.044039                    | 261.0451        | -261.0027       | -6.11 <sup>a</sup>                                   |                                           |                                                      |                                                        |
| NHNO <sub>2</sub>                                                                   | 0.026347      | 0.0306                      | -260.4888       | -260.4592       | -22.87 <sup>a</sup>                                  |                                           |                                                      |                                                        |
|  | 0.10378       | 0.112883                    | -558.5286       | -558.4198       | 287.85                                               |                                           |                                                      |                                                        |
|  | 0.08942       | 0.098394                    | -557.9754       | -557.8805       | 167.79                                               |                                           |                                                      |                                                        |
|  | 0.098696      | 0.113165                    | -1021.7620      | -1021.6528      | 200.7628                                             |                                           |                                                      |                                                        |
|  | 0.125765      | 0.140677                    | -1022.8750      | -1022.73937     | 366.0846                                             |                                           | 79.53528                                             | 286.5493                                               |

<sup>a</sup> Data from NIST WebBook.

**Table S2.** Calculated heat of formation for energetic salts from G2.

| Comp. | $\Delta H_L$<br>(Kcal mol <sup>-1</sup> ) | $\Delta H_f^{\text{cation}}$<br>(kJ mol <sup>-1</sup> ) | $\Delta H_f^{\text{anion}}$<br>(kJ mol <sup>-1</sup> ) | $\Delta H_f^{298}$<br>(kJ mol <sup>-1</sup> ) |
|-------|-------------------------------------------|---------------------------------------------------------|--------------------------------------------------------|-----------------------------------------------|
| 7     | 1355.7                                    | 626.4                                                   | 200.7628                                               | 97.8                                          |
| 8     | 1310.9                                    | 770                                                     | 200.7628                                               | 429.9                                         |
| 9     | 1314.0                                    | 669.5                                                   | 200.7628                                               | 225.7                                         |

### 3. Crystallographic data

Deposition Numbers 2277514 (for **6**), 2277515 (for **7•H<sub>2</sub>O**) contain the supplementary crystallographic data for this paper. These data are provided free of charge by the joint Cambridge Crystallographic Data Centre Access Structures service via <https://www.ccdc.cam.ac.uk>.

**Table S3.** Crystallographic data and refinement parameters.

|                                        | <b>6</b>                                                    | <b>7•H<sub>2</sub>O</b>                                       |
|----------------------------------------|-------------------------------------------------------------|---------------------------------------------------------------|
| Empirical formula                      | C <sub>4</sub> H <sub>3</sub> N <sub>9</sub> O <sub>5</sub> | C <sub>4</sub> H <sub>11</sub> N <sub>11</sub> O <sub>6</sub> |
| Formula weight                         | 257.15                                                      | 309.24                                                        |
| Temperature/K                          | 296(2)                                                      | 170.0                                                         |
| Crystal system                         | monoclinic                                                  | triclinic                                                     |
| Space group                            | P2 <sub>1</sub>                                             | P-1                                                           |
| a/Å                                    | 8.078(6)                                                    | 8.1297(10)                                                    |
| b/Å                                    | 6.215(5)                                                    | 8.7667(11)                                                    |
| c/Å                                    | 8.920(7)                                                    | 16.667(2)                                                     |
| $\alpha$ /°                            | 90                                                          | 89.131(4)                                                     |
| $\beta$ /°                             | 102.188(10)                                                 | 87.895(4)                                                     |
| $\gamma$ /°                            | 90                                                          | 75.168(4)                                                     |
| Volume/Å <sup>3</sup>                  | 437.7(6)                                                    | 1147.5(2)                                                     |
| Z                                      | 2                                                           | 4                                                             |
| $\rho_{\text{calc}}/\text{cm}^3$       | 1.951                                                       | 1.790                                                         |
| $\mu/\text{mm}^{-1}$                   | 0.177                                                       | 0.162                                                         |
| F(000)                                 | 260.0                                                       | 640.0                                                         |
| Crystal size/mm <sup>3</sup>           | 0.18 × 0.16 × 0.1                                           | 0.12 × 0.08 × 0.05                                            |
| Radiation                              | MoK $\alpha$ ( $\lambda = 0.71073$ )                        | MoK $\alpha$ ( $\lambda = 0.71073$ )                          |
| 2 $\theta$ range for data collection/° | 4.672 to 55.34                                              | 4.806 to 52.812                                               |
| Index ranges                           | -10 ≤ h ≤ 8, -6 ≤ k ≤ 8, -11 ≤ l ≤ 11                       | ? ≤ h ≤ ?, ? ≤ k ≤ ?, ? ≤ l                                   |
| Reflections collected                  | 2468                                                        | 4633                                                          |

|                                                |                                                                  |                                                        |
|------------------------------------------------|------------------------------------------------------------------|--------------------------------------------------------|
| Independent reflections                        | 1658 [ $R_{\text{int}} = 0.0588$ , $R_{\text{sigma}} = 0.1052$ ] | 4633 [ $R_{\text{int}} = ?$ , $R_{\text{sigma}} = 0$ ] |
| Data/restraints/parameters                     | 1658/1/163                                                       | 4633/22/459                                            |
| Goodness-of-fit on $F^2$                       | 1.096                                                            | 1.021                                                  |
| Final R indexes [ $I \geq 2\sigma(I)$ ]        | $R_1 = 0.0728$ , $wR_2 = 0.1836$                                 | $R_1 = 0.0673$ , $wR_2 = 0.12$                         |
| Final R indexes [all data]                     | $R_1 = 0.1037$ , $wR_2 = 0.2230$                                 | $R_1 = 0.1423$ , $wR_2 = 0.14$                         |
| Largest diff. peak/hole / $e \text{ \AA}^{-3}$ | 0.38/-0.60                                                       | 0.33/-0.34                                             |

**Table S4.** Bond lengths [ $\text{\AA}$ ] for compound **6**

| Atom | Atom | Length/ $\text{\AA}$ | Atom | Atom | Length/ $\text{\AA}$ |
|------|------|----------------------|------|------|----------------------|
| O1   | N1   | 1.216(10)            | N2   | N8   | 1.312(9)             |
| O2   | N1   | 1.224(9)             | N3   | N7   | 1.380(9)             |
| C2   | C3   | 1.456(11)            | N3   | C4   | 1.363(10)            |
| C2   | O5   | 1.187(11)            | N4   | C1   | 1.371(10)            |
| C2   | N4   | 1.385(11)            | N5   | N6   | 1.359(9)             |
| O3   | N2   | 1.233(9)             | N6   | C4   | 1.339(12)            |
| C3   | N3   | 1.358(10)            | N7   | C1   | 1.299(10)            |
| C3   | N5   | 1.303(11)            | N8   | C4   | 1.345(11)            |
| O4   | N2   | 1.264(9)             | N9   | C1   | 1.391(10)            |
| N1   | N9   | 1.372(10)            |      |      |                      |

**Table S5.** Bond angles [ $^\circ$ ] for compound **6**

| Atom Atom Atom | Angle/ $^\circ$ | Atom Atom Atom | Angle/ $^\circ$ |
|----------------|-----------------|----------------|-----------------|
| O5 C2 C3       | 126.4(9)        | C4 N3 N7       | 125.6(7)        |
| O5 C2 N4       | 122.7(7)        | C1 N4 C2       | 123.4(7)        |
| N4 C2 C3       | 110.9(8)        | C3 N5 N6       | 103.9(7)        |
| N3 C3 C2       | 120.5(8)        | C4 N6 N5       | 113.4(7)        |
| N5 C3 C2       | 128.1(8)        | C1 N7 N3       | 111.6(7)        |
| N5 C3 N3       | 111.3(7)        | N2 N8 C4       | 114.5(7)        |
| O1 N1 O2       | 127.0(7)        | N1 N9 C1       | 123.7(6)        |
| O1 N1 N9       | 115.3(7)        | N4 C1 N9       | 118.3(6)        |
| O2 N1 N9       | 117.6(7)        | N7 C1 N4       | 127.2(7)        |
| O3 N2 O4       | 119.2(7)        | N7 C1 N9       | 114.3(7)        |
| O3 N2 N8       | 117.7(7)        | N6 C4 N3       | 103.5(7)        |
| O4 N2 N8       | 123.1(7)        | N6 C4 N8       | 135.4(7)        |
| C3 N3 N7       | 126.4(6)        | N8 C4 N3       | 121.2(8)        |
| C3 N3 C4       | 108.0(7)        |                |                 |

**Table S6.** Hydrogen bonds of compound **6**

| D-H...A    | d(D-H)/Å | d(H...A)/Å | d(D...A)/Å | <(DHA)° |
|------------|----------|------------|------------|---------|
| N4-H5...O2 | 0.86     | 2.3        | 2.722(10)  | 111     |
| N4-H5...O2 | 0.86     | 2.23       | 3.002(10)  | 150     |
| N6-H6...O1 | 0.86     | 2.31       | 3.142(10)  | 162     |
| N6-H6...O4 | 0.86     | 2.06       | 2.541(9)   | 114     |
| N9-H9...O3 | 0.82     | 2.49       | 3.105(11)  | 132     |
| N9-H9...O4 | 0.82     | 2.08       | 2.847(9)   | 155     |
| N9-H9...N2 | 0.82     | 2.5        | 3.198(10)  | 143     |

**Table S7.** Bond lengths [Å] for compound **7•H<sub>2</sub>O**

| Atom  | Atom  | Length/Å | Atom  | Atom  | Length/Å |
|-------|-------|----------|-------|-------|----------|
| O(3)  | C(2)  | 1.222(4) | N(22) | N(21) | 1.317(4) |
| O(12) | N(22) | 1.266(4) | N(1)  | N(2)  | 1.329(4) |
| O(10) | C(7)  | 1.219(4) | N(7)  | N(8)  | 1.389(4) |
| O(8)  | N(14) | 1.270(4) | N(7)  | C(4)  | 1.323(4) |
| O(11) | N(22) | 1.245(4) | N(3)  | C(1)  | 1.382(4) |
| O(2)  | N(1)  | 1.256(4) | N(3)  | C(2)  | 1.375(4) |
| O(4)  | N(10) | 1.252(4) | N(16) | N(17) | 1.384(4) |
| O(1)  | N(1)  | 1.247(4) | N(16) | C(5)  | 1.328(5) |
| O(5)  | N(10) | 1.252(4) | N(5)  | C(1)  | 1.318(4) |
| O(9)  | N(14) | 1.245(4) | N(15) | N(14) | 1.321(4) |
| N(18) | N(19) | 1.377(4) | N(15) | C(5)  | 1.376(5) |
| N(18) | C(6)  | 1.364(4) | N(17) | C(6)  | 1.307(4) |
| N(18) | C(5)  | 1.370(4) | N(10) | N(9)  | 1.316(4) |
| N(19) | C(8)  | 1.312(4) | N(2)  | C(1)  | 1.373(4) |
| N(20) | C(8)  | 1.377(4) | N(21) | C(8)  | 1.379(4) |
| N(20) | C(7)  | 1.370(4) | N(8)  | C(3)  | 1.311(4) |
| N(6)  | N(5)  | 1.377(4) | N(9)  | C(4)  | 1.363(4) |
| N(6)  | C(3)  | 1.355(4) | C(6)  | C(7)  | 1.451(5) |
| N(6)  | C(4)  | 1.373(4) | C(3)  | C(2)  | 1.450(5) |

**Table S8.** Bond angles [°] for compound **7•H<sub>2</sub>O**

| Atom | Atom  | Atom  | Angle/°  | Atom  | Atom  | Atom  | Angle/°  |
|------|-------|-------|----------|-------|-------|-------|----------|
| C(6) | N(18) | N(19) | 127.5(3) | O(9)  | N(14) | N(15) | 124.4(3) |
| C(6) | N(18) | C(5)  | 105.5(3) | C(3)  | N(8)  | N(7)  | 106.5(3) |
| C(5) | N(18) | N(19) | 126.9(3) | N(10) | N(9)  | C(4)  | 118.0(3) |
| C(8) | N(19) | N(18) | 113.1(3) | N(18) | C(6)  | C(7)  | 118.2(3) |
| C(7) | N(20) | C(8)  | 125.3(3) | N(17) | C(6)  | N(18) | 110.9(3) |

|       |       |       |          |       |      |       |          |
|-------|-------|-------|----------|-------|------|-------|----------|
| C(3)  | N(6)  | N(5)  | 128.3(3) | N(17) | C(6) | C(7)  | 130.9(3) |
| C(3)  | N(6)  | C(4)  | 106.1(3) | N(5)  | C(1) | N(3)  | 123.2(3) |
| C(4)  | N(6)  | N(5)  | 125.6(3) | N(5)  | C(1) | N(2)  | 111.6(3) |
| O(12) | N(22) | N(21) | 115.2(3) | N(2)  | C(1) | N(3)  | 125.3(3) |
| O(11) | N(22) | O(12) | 119.9(3) | N(18) | C(5) | N(15) | 116.1(3) |
| O(11) | N(22) | N(21) | 124.8(3) | N(16) | C(5) | N(18) | 108.5(3) |
| O(2)  | N(1)  | N(2)  | 115.0(3) | N(16) | C(5) | N(15) | 135.4(3) |
| O(1)  | N(1)  | O(2)  | 120.7(3) | N(6)  | C(3) | C(2)  | 118.4(3) |
| O(1)  | N(1)  | N(2)  | 124.3(3) | N(8)  | C(3) | N(6)  | 110.7(3) |
| C(4)  | N(7)  | N(8)  | 108.5(3) | N(8)  | C(3) | C(2)  | 130.9(3) |
| C(2)  | N(3)  | C(1)  | 125.7(3) | N(19) | C(8) | N(20) | 123.5(3) |
| C(5)  | N(16) | N(17) | 108.4(3) | N(19) | C(8) | N(21) | 111.4(3) |
| C(1)  | N(5)  | N(6)  | 112.6(3) | N(20) | C(8) | N(21) | 125.1(3) |
| N(14) | N(15) | C(5)  | 116.7(3) | N(7)  | C(4) | N(6)  | 108.3(3) |
| C(6)  | N(17) | N(16) | 106.6(3) | N(7)  | C(4) | N(9)  | 135.7(3) |
| O(4)  | N(10) | N(9)  | 123.2(3) | N(9)  | C(4) | N(6)  | 116.0(3) |
| O(5)  | N(10) | O(4)  | 120.5(3) | O(3)  | C(2) | N(3)  | 122.5(3) |
| O(5)  | N(10) | N(9)  | 116.3(3) | O(3)  | C(2) | C(3)  | 125.8(3) |
| N(1)  | N(2)  | C(1)  | 120.3(3) | N(3)  | C(2) | C(3)  | 111.7(3) |
| N(22) | N(21) | C(8)  | 120.1(3) | O(10) | C(7) | N(20) | 123.5(3) |
| O(8)  | N(14) | N(15) | 114.8(3) | O(10) | C(7) | C(6)  | 124.1(3) |
| O(9)  | N(14) | O(8)  | 120.8(3) | N(20) | C(7) | C(6)  | 112.3(3) |

**Table S9.** Hydrogen bonds of compound **7•H<sub>2</sub>O**

| D-H...A        | d(D-H)/Å | d(H...A)/Å | d(D...A)/Å | <(DHA) <sup>o</sup> |
|----------------|----------|------------|------------|---------------------|
| N3-H3...O1     | 0.88     | 1.96       | 2.587(4)   | 127                 |
| N3-H3...N1     | 0.88     | 2.56       | 2.846(4)   | 100                 |
| N3-H3...O1     | 0.88     | 2.33       | 3.159(4)   | 156                 |
| N4-H4A...O3    | 0.89(3)  | 2.01(3)    | 2.893(4)   | 172(3)              |
| N4-H4B...O6    | 0.89(3)  | 1.94(3)    | 2.827(4)   | 174(3)              |
| O6-H6A...N8    | 0.88(3)  | 2.08(3)    | 2.933(4)   | 164(4)              |
| O7-H7A...N2    | 0.88(4)  | 2.01(4)    | 2.871(4)   | 170(5)              |
| O7-H7B...N19   | 0.88(5)  | 2.22(5)    | 3.067(5)   | 163(5)              |
| N11-H11B...O4  | 0.89(3)  | 2.34(3)    | 2.855(4)   | 116(3)              |
| N11-H11B...N7  | 0.89(3)  | 1.98(4)    | 2.836(5)   | 161(4)              |
| N11-H11C...O4  | 0.89(4)  | 2.31(4)    | 3.135(4)   | 154(3)              |
| N11-H11C...O5  | 0.89(4)  | 2.26(4)    | 3.012(5)   | 143(4)              |
| N12-H12A...N9  | 0.88(3)  | 2.05(4)    | 2.919(6)   | 172(5)              |
| N12-H12B...O7  | 0.87(4)  | 1.95(4)    | 2.809(6)   | 173(4)              |
| N12-H12C...O8  | 0.86(3)  | 2.54(6)    | 3.042(6)   | 118(5)              |
| N12-H12D...O10 | 0.88(5)  | 2.19(6)    | 3.034(5)   | 159(6)              |

|                |         |         |          |        |
|----------------|---------|---------|----------|--------|
| N13-H13A...O9  | 0.88(3) | 2.42(3) | 2.889(6) | 114(3) |
| N13-H13A...N16 | 0.88(3) | 2.03(4) | 2.883(5) | 165(4) |
| N13-H13B...O8  | 0.88(5) | 2.13(5) | 2.922(5) | 151(4) |
| N13-H13D...O2  | 0.87(4) | 2.21(5) | 2.968(5) | 146(6) |
| N20-H20...O11  | 0.88    | 1.95    | 2.581(4) | 128    |
| N20-H20...N22  | 0.88    | 2.55    | 2.836(4) | 100    |
| N20-H20...O11  | 0.88    | 2.36    | 3.175(4) | 155    |

#### 4. NMR, DSC and IR spectra of new compounds

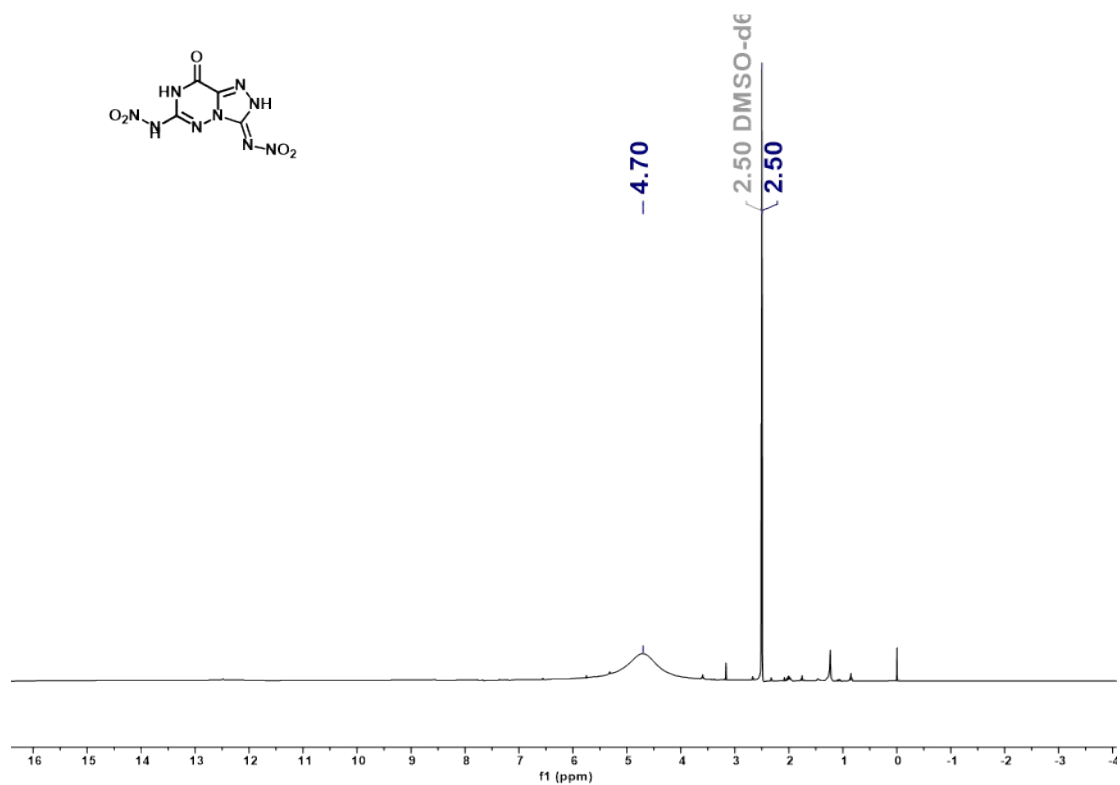

**Figure S1**  $^1\text{H}$  NMR of compound **6** in DMSO[D6].



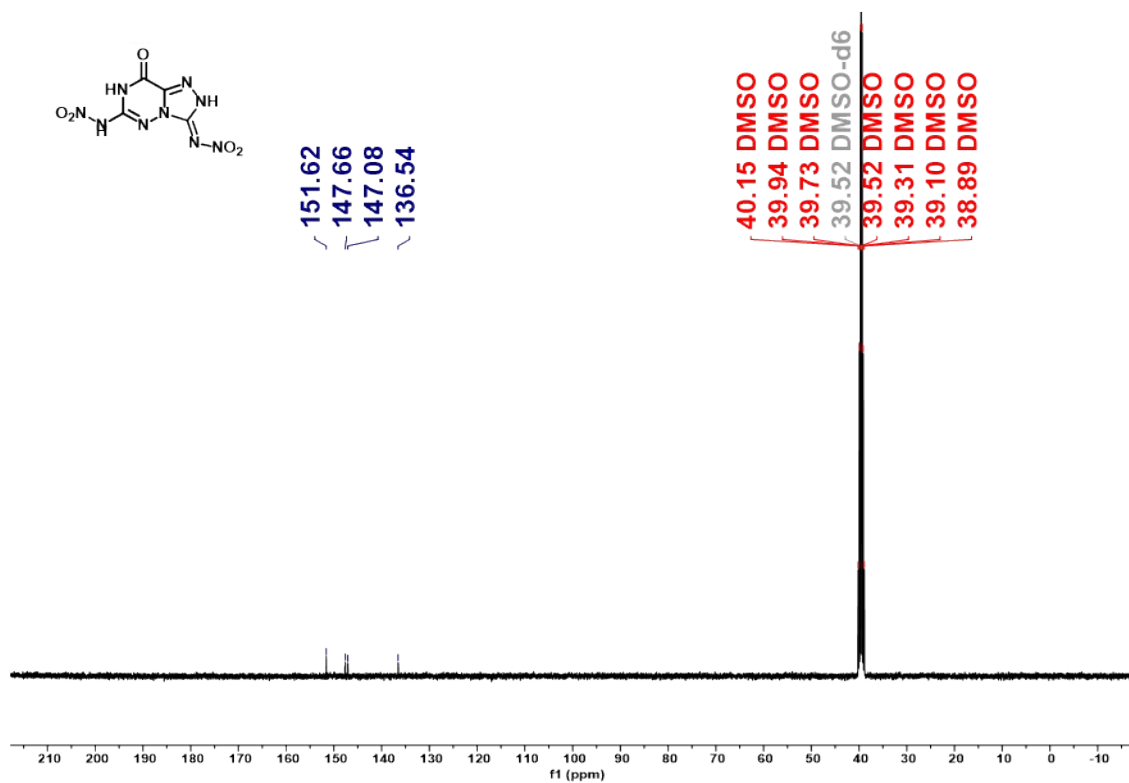

Figure S2. <sup>13</sup>C NMR of compound 6 in DMSO[D6].

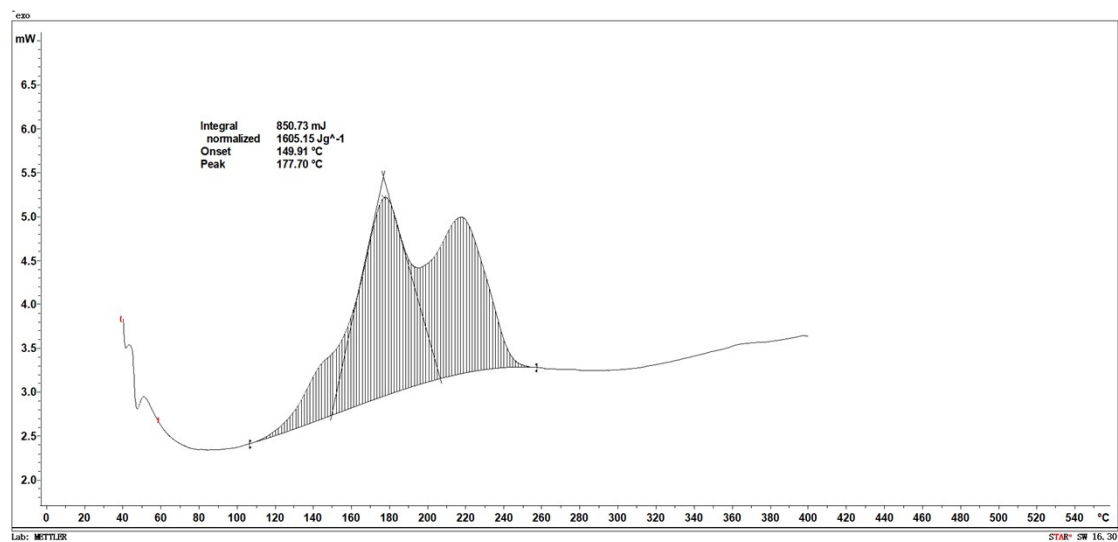

Figure S3. DSC curve of 6.

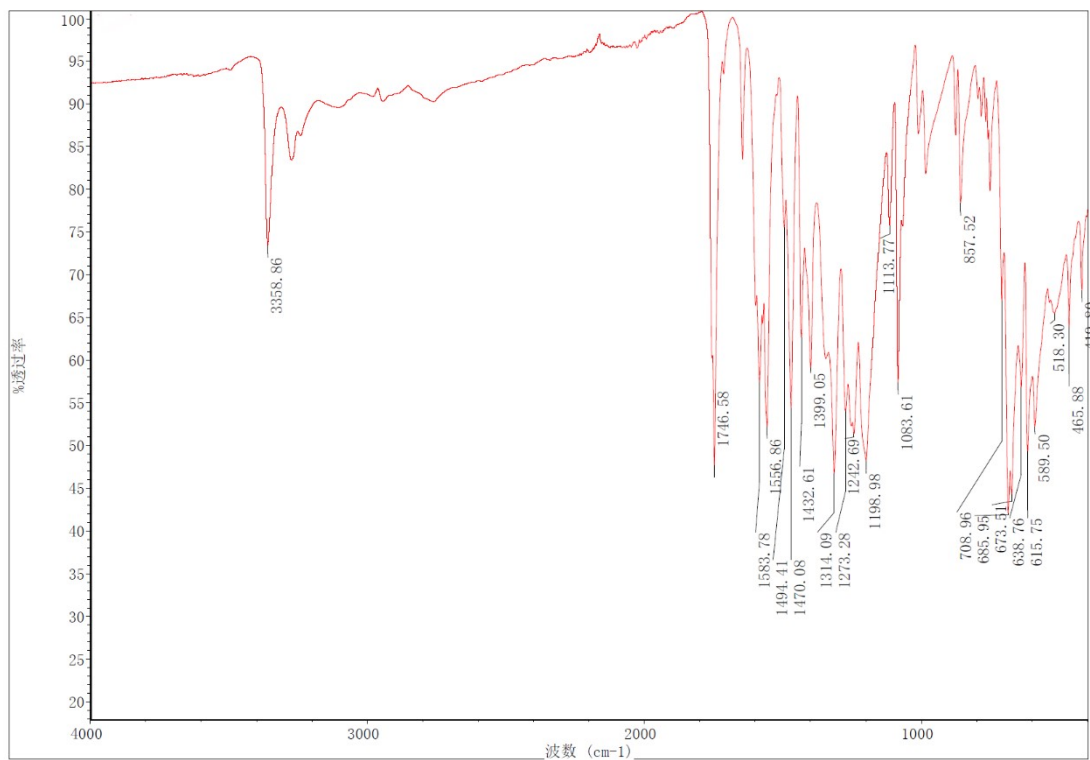

Figure S4. IR spectra of 6.

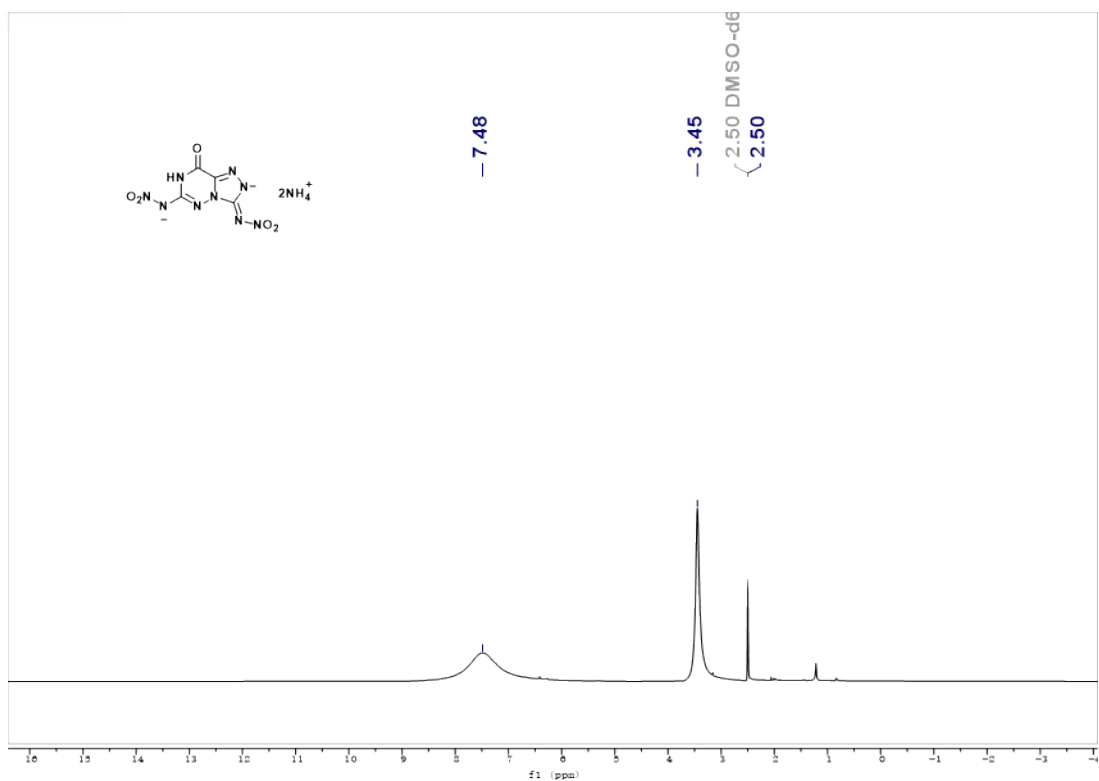

Figure S5. <sup>1</sup>H NMR of compound 7 in DMSO[D6].

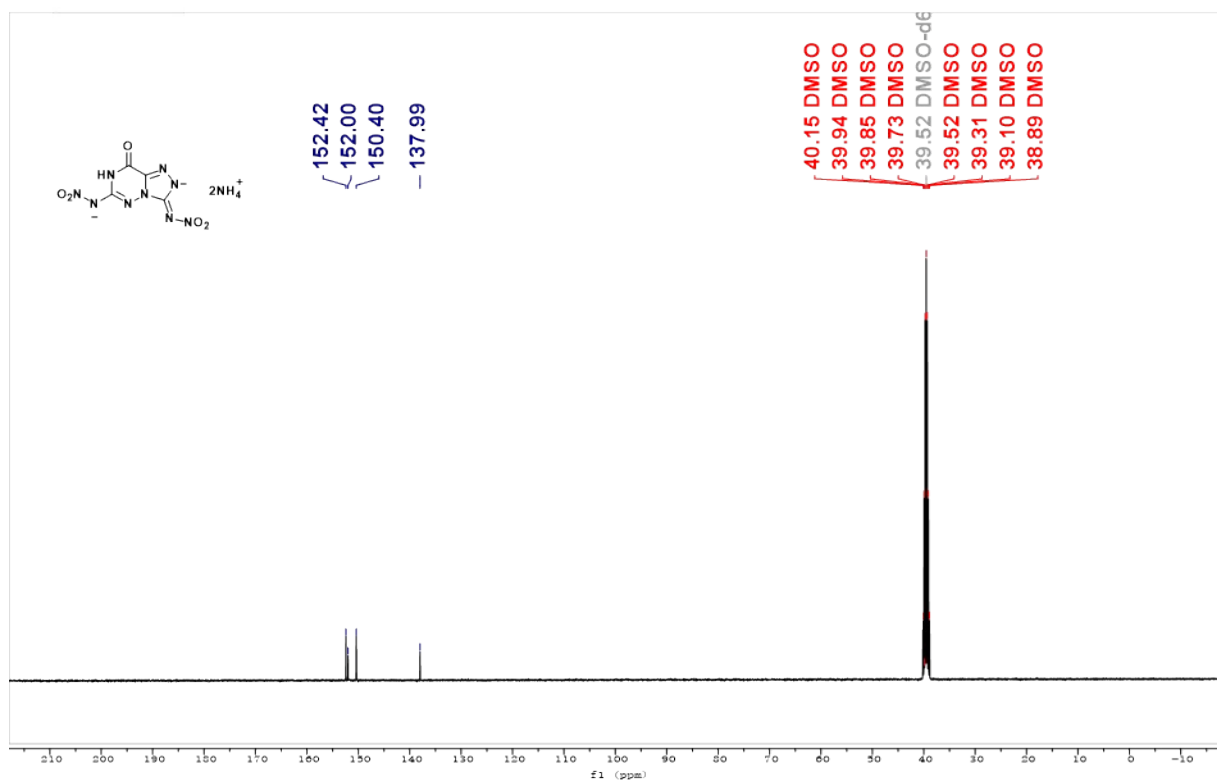

**Figure S6.** <sup>13</sup>C NMR of compound 7 in DMSO[D6].

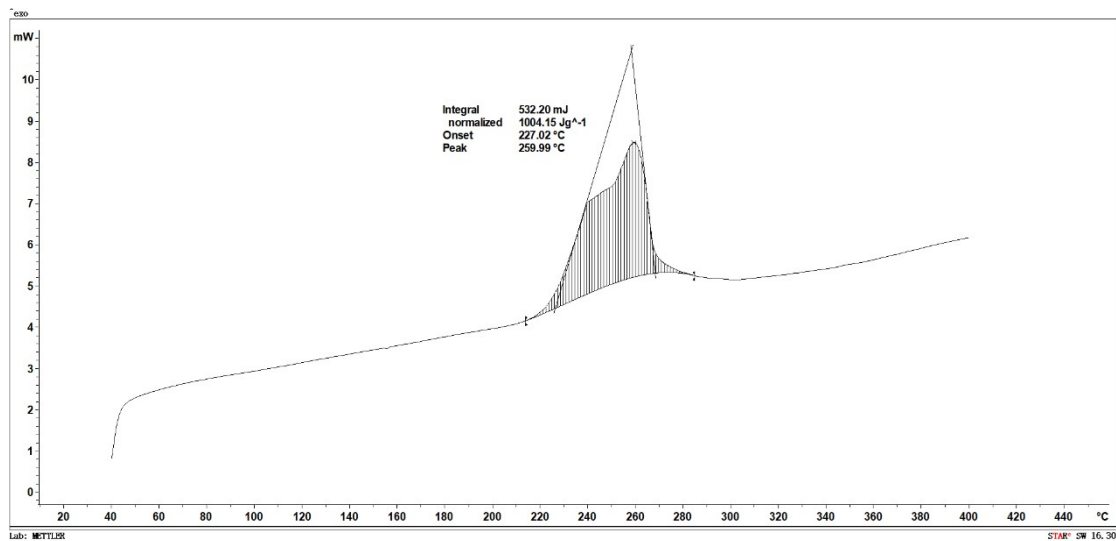

**Figure S7.** DSC curve of 7.

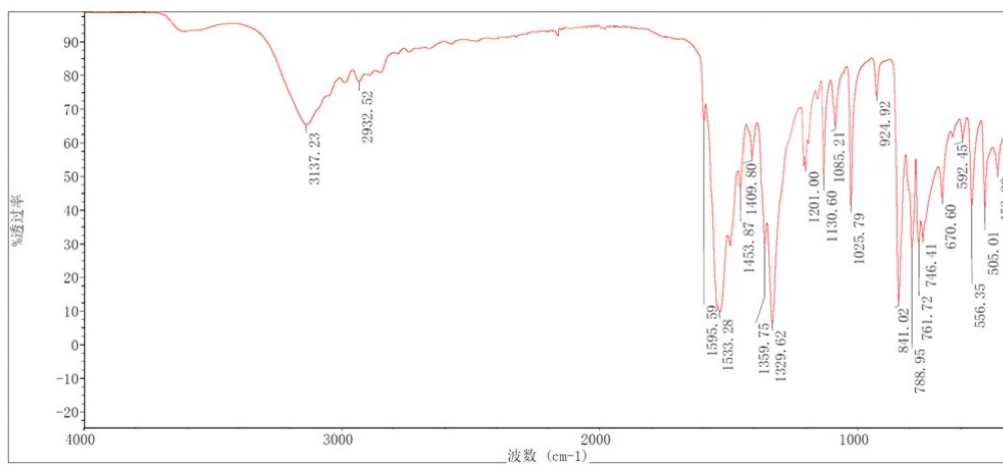

Figure S8. IR spectra of 7.

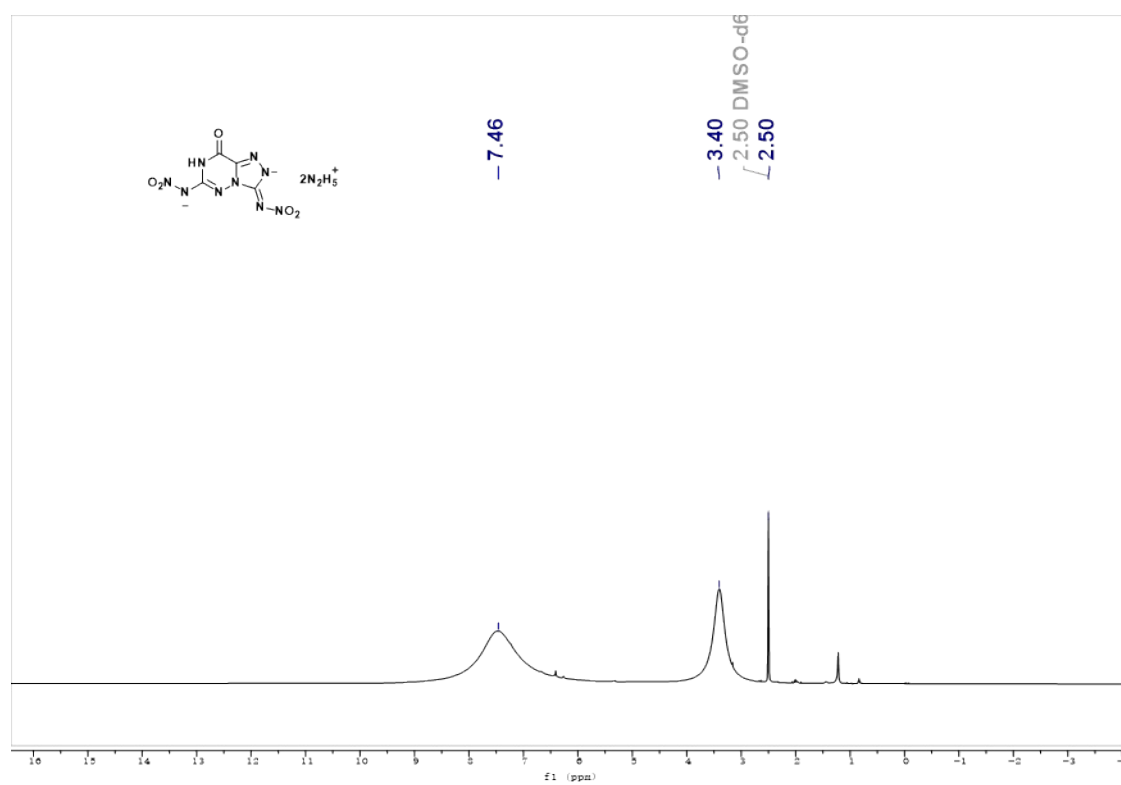

Figure S9.  $^1\text{H}$  NMR of compound 8 in DMSO[D6].

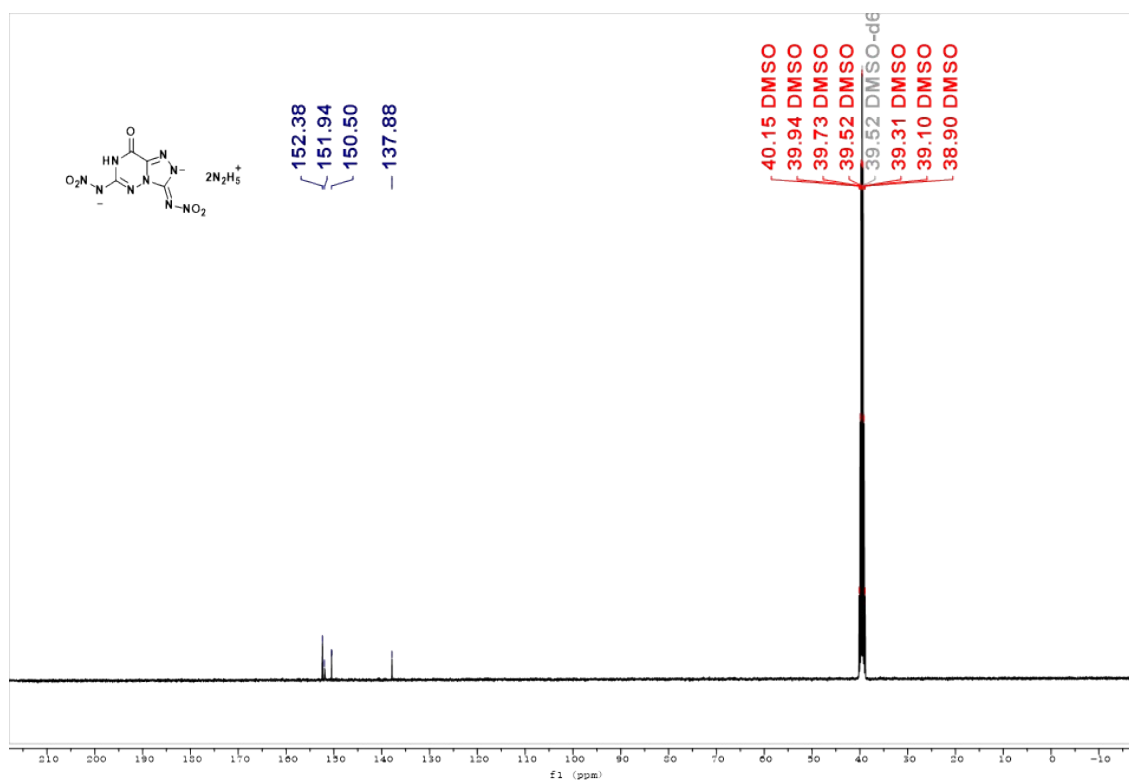

**Figure S10.** <sup>13</sup>C NMR of compound **8** in DMSO[D<sub>6</sub>].

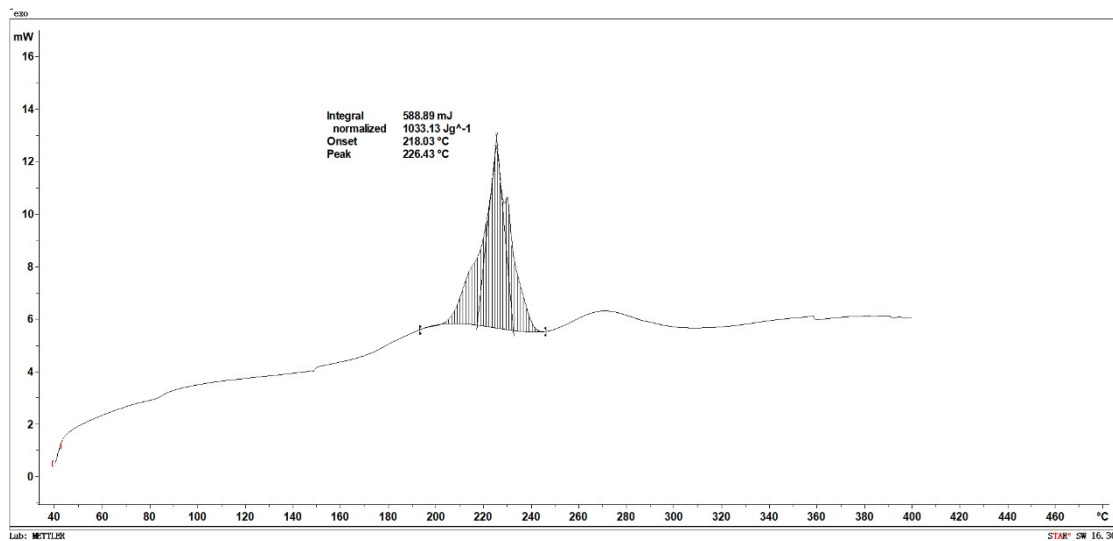

**Figure S11.** DSC curve of **8**.

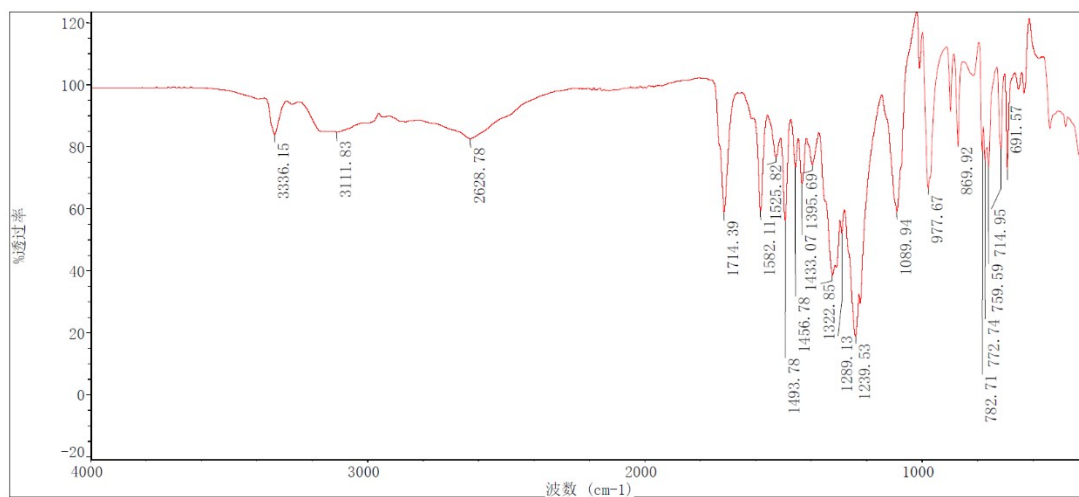

**Figure S12.** IR spectra of **8**.

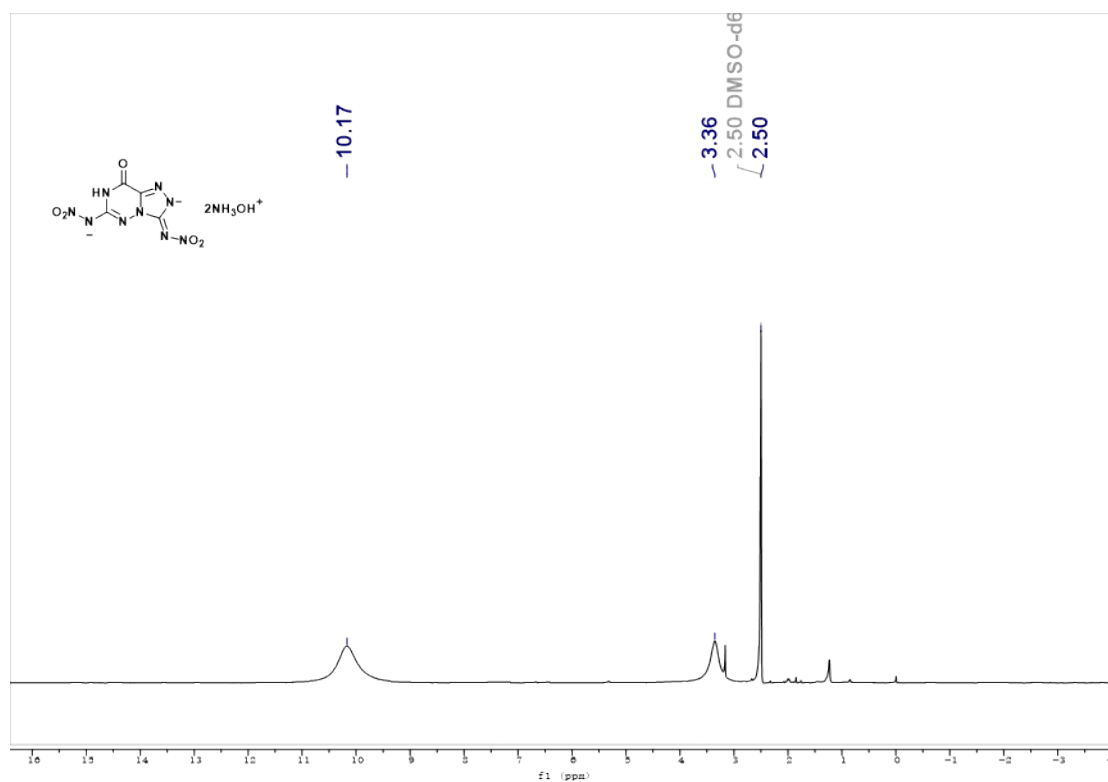

**Figure S13.** <sup>1</sup>H NMR of compound **9** in DMSO[D<sub>6</sub>].

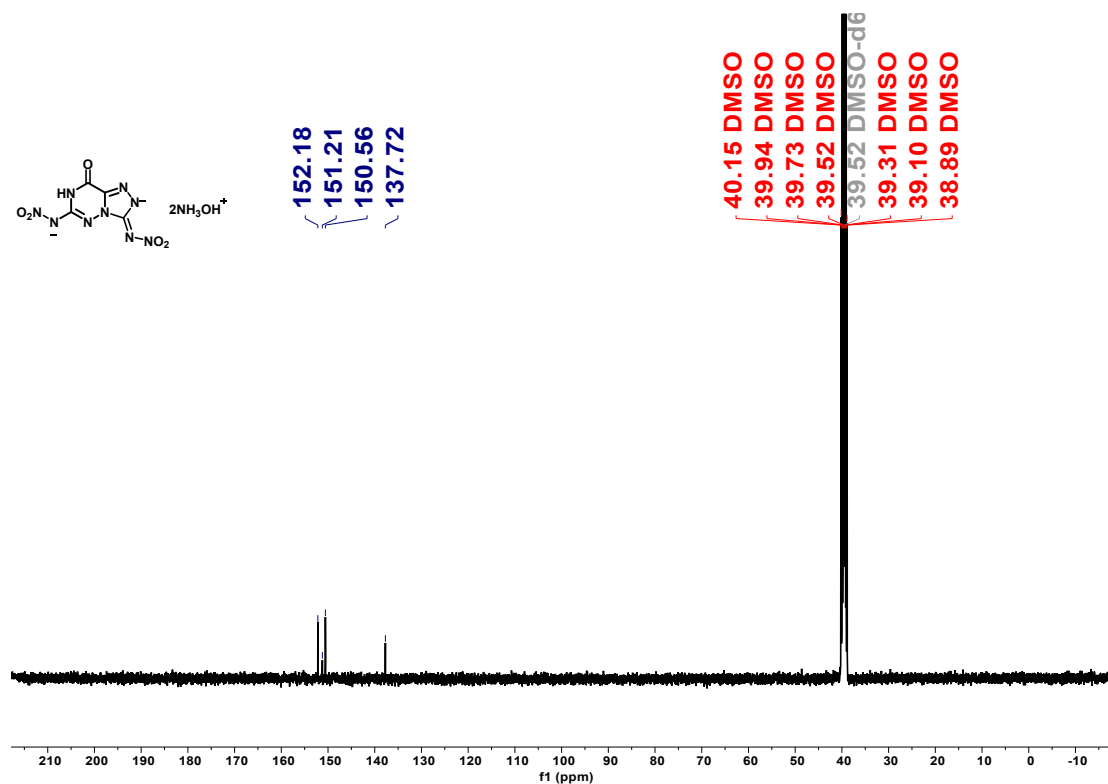

Figure S14.  $^{13}\text{C}$  NMR of compound 9 in DMSO[D6].

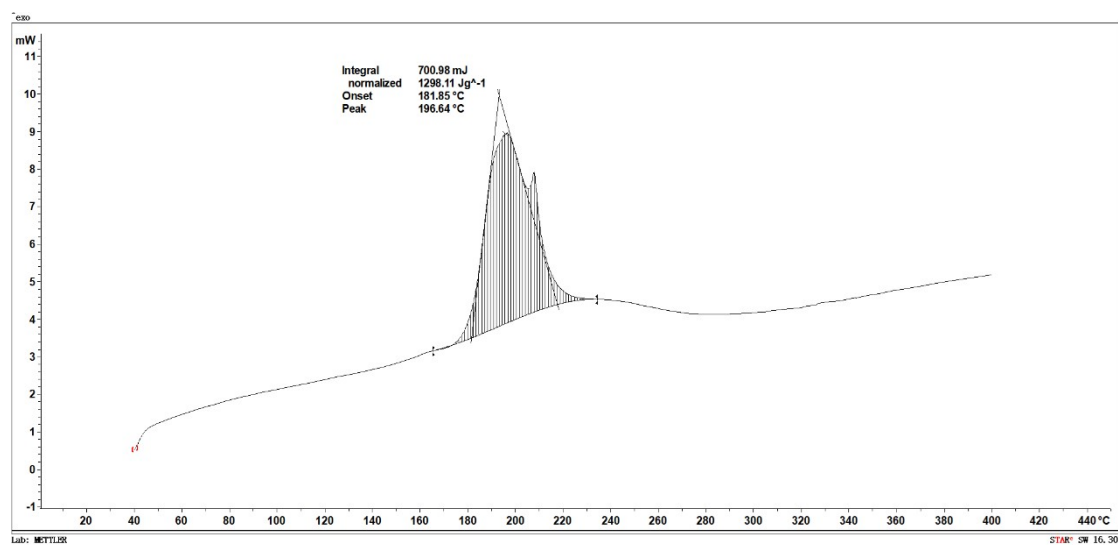

Figure S15. DSC curve of 9.

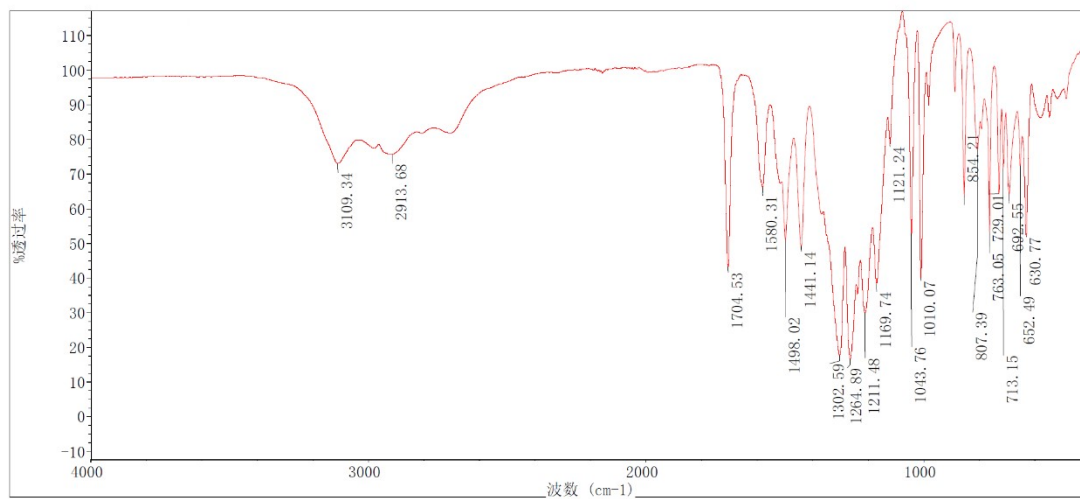

**Figure S16.** IR spectra of **9**.

## Reference

- [1] A. D. Becke, *J. Chem Phys.* **1993**, *98*, 5648-5652.  
[2] a) A. Strömberg, O. Gropen, U. Wahlgren, *J. Comput. Chem.* **1983**, *4*, 181–186; b) M. N. Glukhovtsev, A. Pross, M. P. McGrath, L. Radom, *J. Chem. Phys.* **1995**, *103*, 1878–1885.
